# Supplementary material for: Macrocyclic multi-telluranes with hypervalent Te–O apical linkages
Source: Royal Society of Chemistry journal article supplement (doi:10.1039/b103676a), 2001-01-01
Supplement: b103676a.doc [file b103676a.doc]

# Macrocyclic multi-telluranes with hypervalent Te-O apical linkages

Kenji Kobayashi,*a Hiroyuki Izawa,a Kentaro Yamaguchi,b Ernst Hornc and Naomichi Furukawaa

### aDepartment of Chemistry, University of Tsukuba, Tsukuba, Ibaraki 305-8571, Japan

### E-mail: [*kenjinor@staff.chem.tsukuba.ac.jp*](mailto:kenjinor@staff.chem.tsukuba.ac.jp)

bChemical Analysis Center, Chiba University, Inage-ku, Chiba 263-8522, Japan

cDepartment of Chemistry, Rikkyo University, Nishi-Ikebukuro, Toshima-ku, Tokyo 171-8501, Japan

**Supplementary Information**

**Macrocyclic multi-tellurane (4)**: Triflic anhydride (22.0 L, 0.13 mmol) was added to a suspension of bis(4-methylphenyl) telluroxide (42.0 mg, 0.13 mmol) in dry CH3CN (2 mL) at –40 °C under an argon atmosphere. The mixture immediately changed to a homogeneous pale yellow solution. After stirring at –40 °C for 30 min, the solution containing **1** was added to a suspension of **3** (27.0 mg, 0.13 mmol) in dry CH3CN (2 mL) at room temperature. The resulting mixture immediately changed to a homogeneous pale yellow solution and was stirred at room temperature for 12 h. After evaporation of solvent, the residue was triturated with benzene (10 mL) and then filtered. The filtrate was evaporated, recrystallized from CH3CN, and dried in vacuo to give **4** (46.9 mg, 76% yield) as a white powder. Single crystals were prepared by slow diffusion of *p*-xylene into a solution of **4** in CH3CN.

M.p. 199-200 °C (decomp); 1H NMR (270 MHz, CD2Cl2, 23 °C) ** 2.35 (s, 18H), 7.31 (d, *J* = 8.3 Hz, 12H), 7.38 (dd, *J* = 3.2 and 5.9 Hz, 6H), 7.48 (dd, *J* = 3.2 and 5.9 Hz, 6H), 7.78 (d, *J* = 8.3 Hz, 12H); 125Te NMR (85.2 MHz, CD2Cl2, 23 °C) ** 997.0; IR (KBr) ** 1647 (s), 1307 (s), 1134 (m), 1076 (m), 800 (m), 485 (m) cm–1; FAB-MS (2-nitrophenyl octyl ether matrix) *m*/*z* (%) 1423 (4, [M + H]+), 801 (7, [M – Ar2Te – 2C6H4(CO2)2 + OH]+), 477 (43, [1/3M + H]+), 329 (79, [Ar2TeO + H]+), 312 (100, [Ar2Te]+); Anal. Calcd for C66H54O12Te3·2H2O (%): C, 54.37; H, 4.01. Found: C, 54.05; H, 3.76.

1H NMR spectrum of **4** (CD2Cl2 at 23 °C).

125Te NMR spectrum of **4** (CD2Cl2 at 23 °C).

FAB-MS spectrum of **4** (2-nitrophenyl octyl ether as a matrix).

ORTEP draw of **4** (50% probability thermal ellipsoids).

**Macrocyclic multi-tellurane (5)**: A heterogeneous mixture of **2** (120.0 mg, 0.13 mmol) and **3** (27.0 mg, 0.13 mmol) in dry CH3CN (4 mL) under an argon atmosphere was stirred at room temperature for 24 h, which gradually changed to a homogeneous pale orange solution. After evaporation of solvent, the residue was triturated with benzene (10 mL) and then filtered. The filtrate was evaporated, recrystallized from benzene-hexane (diffusion), and dried in vacuo to give **5** (14.6 mg, 14% yield) as a white powder. Single crystals were prepared by slow diffusion of *p*-xylene into a solution of **5** in benzene.

M.p. 172-174 °C (decomp); 1H NMR (270 MHz, CD2Cl2, 23 °C) ** 2.32 (s, 24H), 7.13 (d, *J* = 8.1 Hz, 16H), 7.31 (dd, *J* = 3.2 and 5.7 Hz, 4H), 7.50 (dd, *J* = 3.2 and 5.7 Hz, 4H), 7.76 (d, *J* = 8.1 Hz, 16H); 125Te NMR (85.2 MHz, CD2Cl2, 23 °C) ** 1044.4; IR (KBr) ** 1635 (s), 1339 (s), 1187 (m), 798 (s), 639 (m), 489 (s) cm–1; FAB-MS (2-nitrophenyl octyl ether matrix) *m*/*z* (%) 1601 (8, [M + H]+), 1509 (8, [M – Ar]+), 1275 (18, [M – Ar2TeO + H]+), 801 (18, [1/2M + H]+), 477 (37, [1/2M – Ar2TeO + H]+), 329 (98, [Ar2TeO + H]+), 312 (100, [Ar2Te]+); Anal. Calcd for C72H64O10Te4·0.5C6H6 (%): C, 54.97; H, 4.12. Found: C, 55.25; H, 4.23.

1H NMR spectrum of **5** (CD2Cl2 at 23 °C).

125Te NMR spectrum of **5** (CD2Cl2 at 23 °C).

FAB-MS spectrum of **5** (2-nitrophenyl octyl ether as a matrix).

Crystal structure of **5** in the unit cell.
